# Supplementary figures and images for: Incubation Period in Coronavirus Disease 2019 (COVID-19): A Literature Review
Source: Preprints.org preprint supplement (doi:10.20944/preprints202005.0487.v1), 2020-05-31

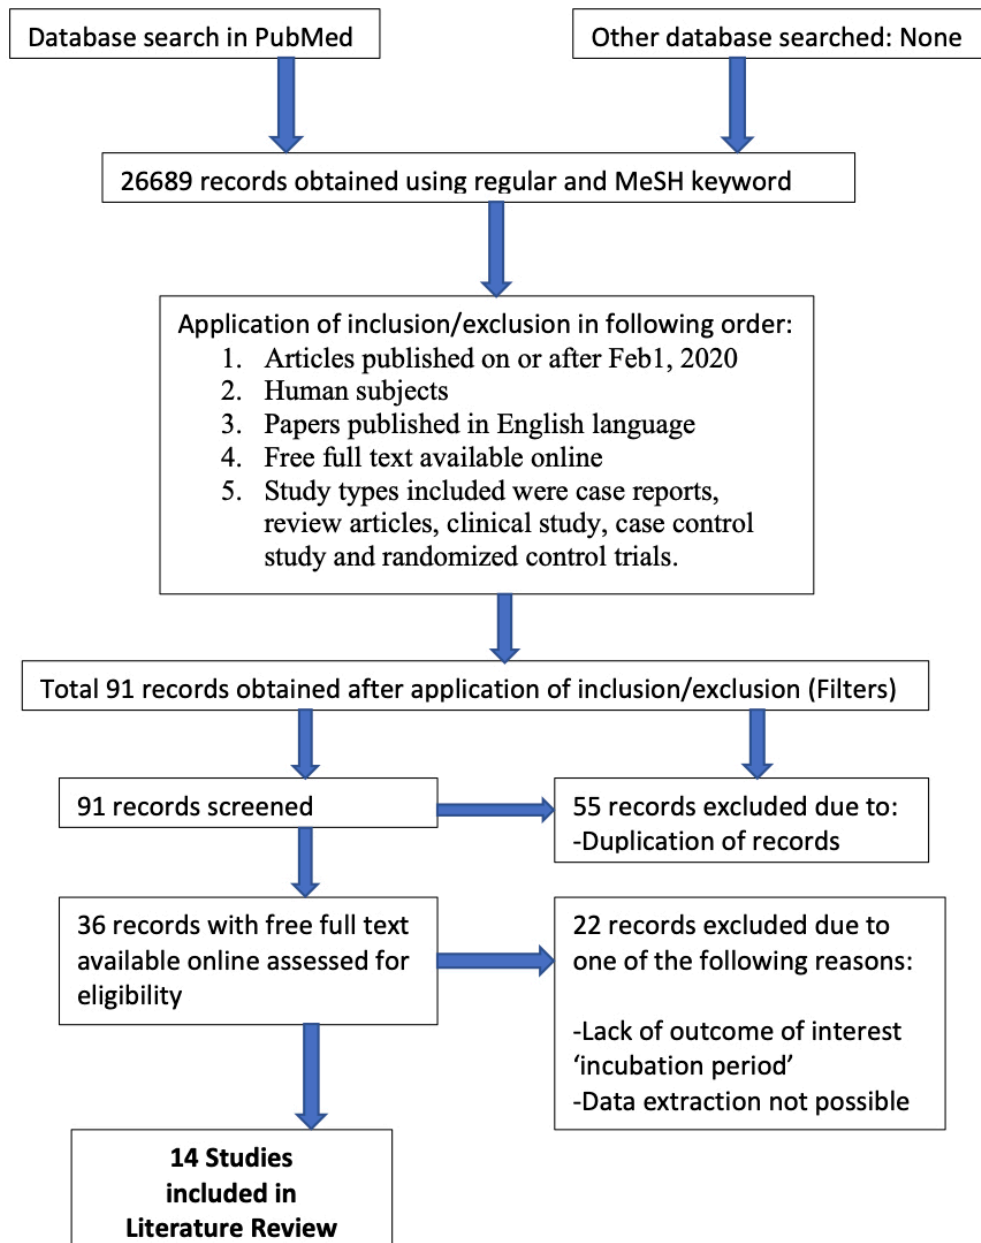

Supplement: Supplementary file 1 [file supplementary]
